# Supplementary material for: Ebola Virus Activates IRE1α-Dependent XBP1u Splicing
Source: MDPI journal article supplement (doi:10.3390/v15010122), 2022-12-30
Supplement: s1 [file s1]

| Name                                | Sequence (5'-3')         |
|-------------------------------------|--------------------------|
| <i>Human BiP fwd.</i>               | CATGGTTCTCACTAAAATGAAAGG |
| <i>Human BiP rev.</i>               | GCTGGTACAGTAACAACCTG     |
| <i>Human Erdj4 fwd.</i>             | AAAATAAGAGCCCGGATGCT     |
| <i>Human Erdj4 rev.</i>             | CGCTTCTTGGATCCAGTGTT     |
| <i>Human p58<sup>IPK</sup> fwd.</i> | CTCAGTTTCATGCTGCCGTA     |
| <i>Human p58<sup>IPK</sup> rev.</i> | TTGCTGCAGTGAAGTCCATC     |
| <i>Human RPS18 fwd.</i>             | GCGGCGGAAAATAGCCTTTG     |
| <i>Human RPS 18 rev.</i>            | GATCACACGTTCCACCTCATC    |

**Supplementary Table S1. Oligonucleotides used for qRT-PCR**

*fwd.* indicates a forward primer, *rev.* indicates a reverse primer

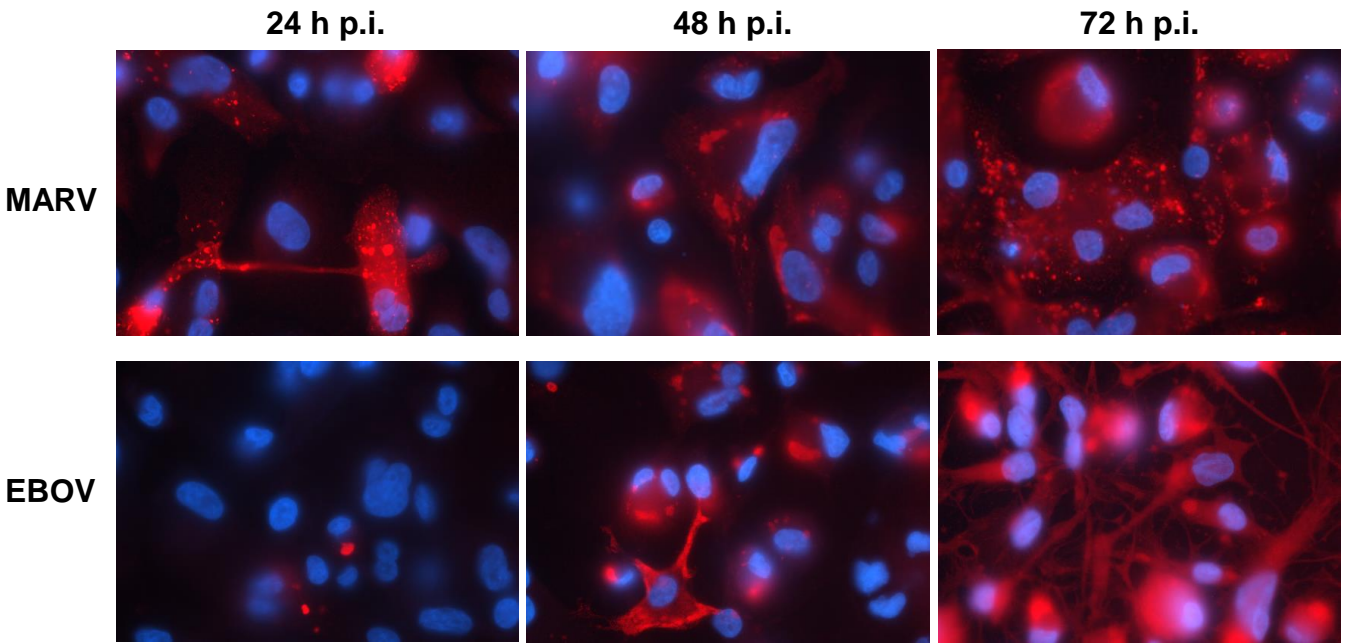

**Figure S1. Filovirus infection of THP-1 cells.** Cells were infected with MARV or EBOV (MOI = 0.1). The cells were fixed with 4% paraformaldehyde at the indicated time points and subjected to IFA using antibodies against the respective NP. The photomicrographs were obtained using the same exposure times. DAPI staining labels cell nuclei.

XBP1 mRNA species:

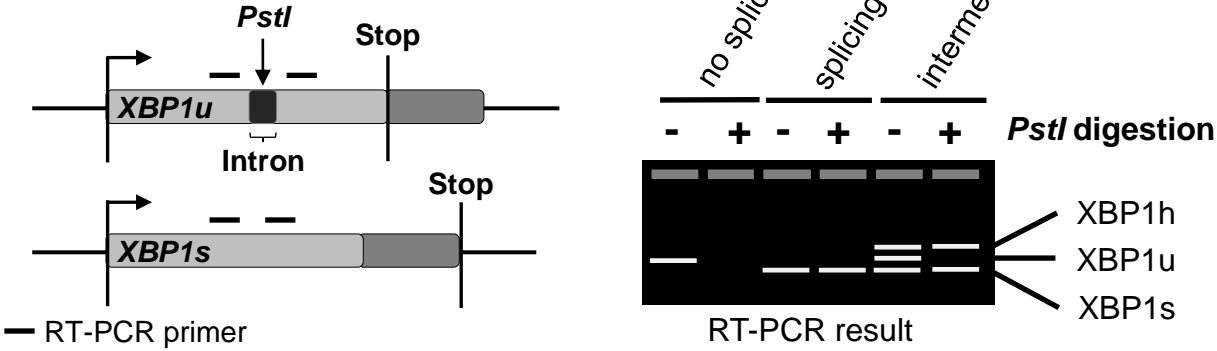

**Figure S2. XBP1-specific RT-PCR.** In the absence of IRE1 $\alpha$  activity, *XBP1u* mRNA will not be spliced; The *PstI* restriction site is present and the PCR product can be digested. If IRE1 $\alpha$  is active, *XBP1u* is spliced; The *PstI* restriction site is thereby removed and the PCR product cannot be digested. Intermediate phenotype: *XBP1u* is partially spliced and a hybrid of XBP1u and XBP1s forms (XBP1h, confirmed by sequencing) that is visible in the agarose gel and resistant to digestion. This has also been shown by e.g. Li *et.al.*, 2010 [52].
